# Supplementary material for: Survival of human embryonic stem cells implanted in the guinea pig auditory epithelium
Source: PubMed Central journal article supplement (PMC5384248; doi:10.1038/srep46058), 2017-04-07

**Supplementary information for:**

**Survival of human embryonic stem cells implanted in the guinea pig  
auditory epithelium**

Min Young Lee, Sandra Hackelberg, Kari L. Green, Kelly G. Lunghamer, Takaomi Kurioka,  
Benjamin Loomis, Donald L. Swiderski, R. Keith Duncan, Yehoash Raphael

**Supplementary Figure 1. whole-mount of the auditory epithelium from a non-deafened ear that received the conditioning treatment**

Epi-fluorescence view of phalloidin stained organ of Corti from a non-deafened guinea pig that received the conditioning protocol. A. an area apical to the region of the injection site, the morphology is normal and only one hair cell is missing. B. In an area closer to the site of injection, a massive loss of outer hair cells is seen, but most inner hair cells survive. Scale bar is 40  $\mu\text{m}$ .

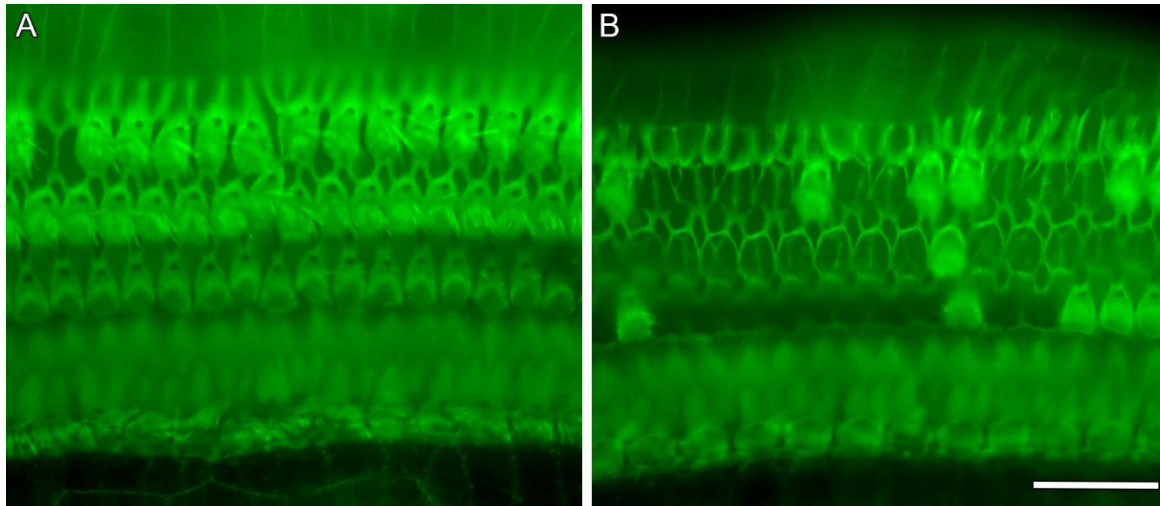

Supplement: srep46058-s1.pdf [file srep46058-s1.pdf]
